# Supplementary material for: Evaluation of intracellular distribution of folate functionalized silica nanoparticles using fluorescence and hyperspectral enhanced dark field microscopy
Source: Royal Society of Chemistry journal article supplement (doi:10.1039/d2nr01821g), 2022-01-01
Supplement: d2nr01821g1.pdf [file d2nr01821g1.pdf]

## Electronic Supplementary Information

of

### Evaluation of intracellular distribution of folate functionalized silica nanoparticles using fluorescence and hyperspectral enhanced dark field microscopy

Luminita Claudia Miclea<sup>a</sup>, Mona Mihailescu<sup>\*,b</sup>, Nicolae Tarba<sup>c</sup>, Ana-Maria Brezoiu<sup>d</sup>, Ana Maria Sandu<sup>e</sup>, Raul-Augustin Mitran<sup>f</sup>, Daniela Berger<sup>d</sup>, Cristian Matei<sup>d</sup>, Mihaela Georgeta Moisescu<sup>\*,a</sup>, Tudor Savopol<sup>a</sup>

---

<sup>a</sup>*Biophysics and Cellular Biotechnology Department, Excellence Center for Research in Biophysics and Cellular Biotechnology, Faculty of Medicine, University of Medicine and Pharmacy Carol Davila, 8 Eroii Sanitari Blvd., Bucharest, 050474, Romania*

<sup>b</sup>*Digital Holography Imaging and Processing Laboratory, Fundamental Sciences Applied in Engineering Research Center, Faculty of Applied Sciences, University "Politehnica" of Bucharest, 313 Splaiul Independentei, Bucharest, 060042, Romania*<sup>c</sup>*Physics Department, Faculty of Applied Sciences, Doctoral School of Automatic Control and Computers, University "Politehnica" of Bucharest, 313 Splaiul Independentei, Bucharest, 060042, Romania*

<sup>d</sup>*Department of Inorganic Chemistry, Physical-Chemistry & Electrochemistry, Faculty of Chemical Engineering and Biotechnologies, University "Politehnica" of Bucharest, 1-7 Polizu st., 11061, Bucharest, Romania*

<sup>e</sup>*CAMPUS Research Center, University "Politehnica" of Bucharest, 313 Splaiul Independentei, Bucharest, 060042, Romania*

<sup>f</sup>*"Ilie Murgulescu" Institute of Physical-Chemistry, Romanian Academy, 202 Splaiul Independentei, Bucharest, 060021, Romania*

\* *Mihaela Georgeta Moisescu ([mihaela.moisescu@umfcd.ro](mailto:mihaela.moisescu@umfcd.ro)), and Mona Mihailescu ([mona.mihailescu@upb.ro](mailto:mona.mihailescu@upb.ro)) are equally sharing the corresponding author position. Refer to Mihaela Georgeta Moisescu for biology-related items and Mona Mihailescu for microscopy and software items.*

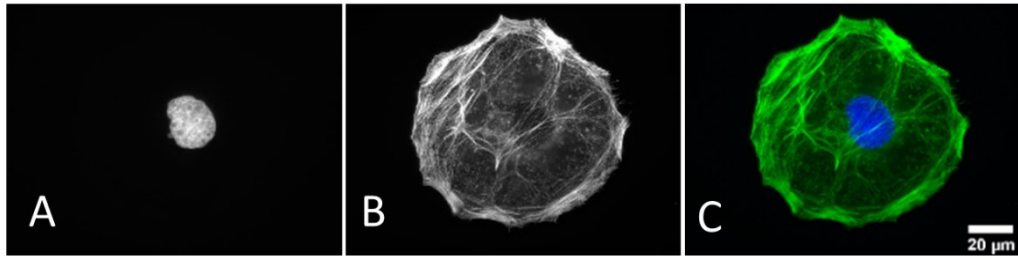

**Fig. S1** Example of fluorescence images of control Caco-2 cell (slices extracted from Z-stack), for nucleus (A) and cytoskeletal actin (B). Images were acquired using enhanced dark field microscopy (ob. 60× with immersion). Cells were double stained with DAPI for the nucleus (digitally colored in blue) and with Alexa Fluor™ 488 Phalloidin for cytoskeletal actin (digitally colored in green). The image resulting from superposing the digitally colored images was obtained using ImageJ software (C).

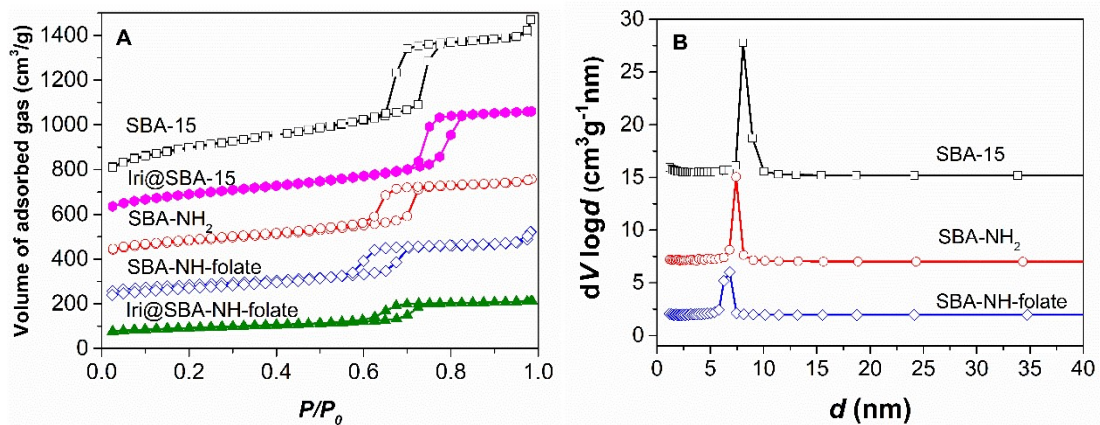

**Fig. S2** Nitrogen adsorption-desorption isotherms of SBA-15 and SBA-NH-folate carriers, as well as the corresponding Irinotecan-loaded carrier (A) and the pore size values distribution curves for mesoporous silica-type supports (B).

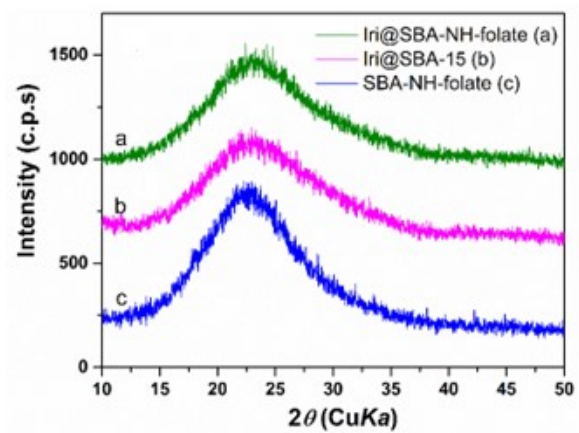

**Fig. S3** Wide angle X-ray diffraction patterns for Irinotecan-loaded samples and folate-functionalized supports.

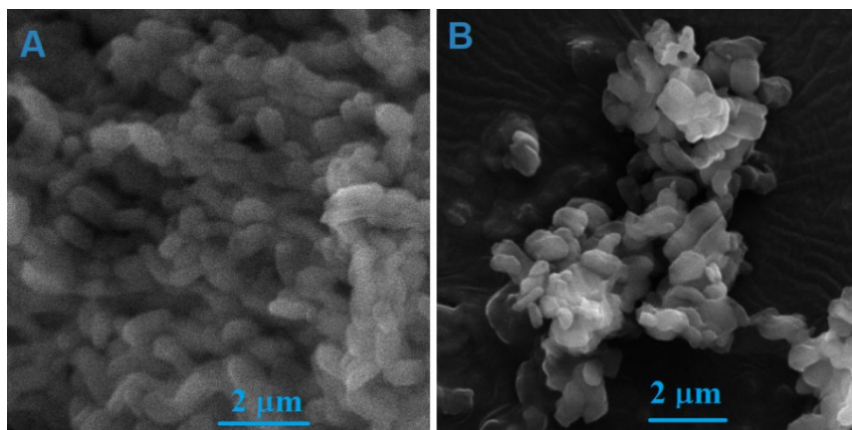

**Fig. S4** SEM images for mesoporous silica particles of SBA-15 (A) and SBA-NH-folate (B).

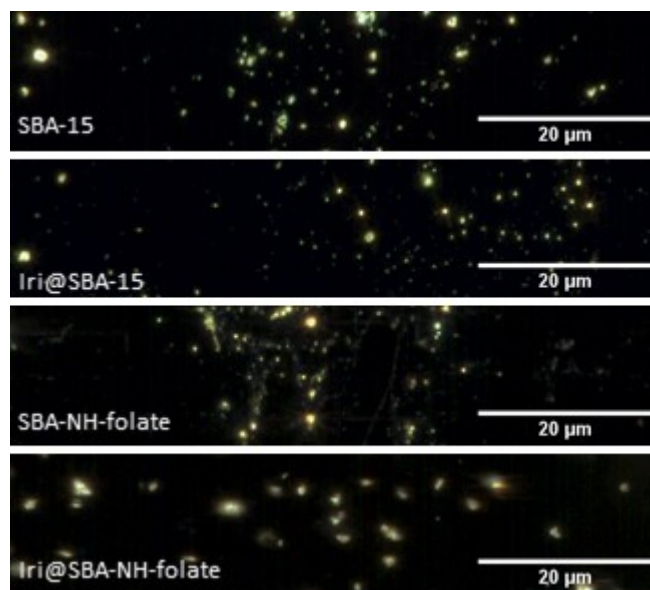

**Fig. S5** Hyperspectral images of nanoparticles suspended in buffered saline solution. Nanoparticles appear as bright dots on a dark background (objective 60× with immersion).
